# Supplementary material for: “Green” Prussian Blue Analogues as Peroxidase Mimetics for Amperometric Sensing and Biosensing
Source: MDPI journal article supplement (doi:10.3390/bios11060193), 2021-06-10
Supplement: s1 [file s1]

## Supporting information

# “Green” Prussian Blue Analogues as Peroxidase Mimetics for Amperometric Sensing and Biosensing

Galina Z. Gayda <sup>1,\*</sup>, Olha M. Demkiv <sup>1,2</sup>, Yanna Gurianov <sup>3</sup>, Roman Ya. Serkiz <sup>1</sup>, Halyna M. Klepach <sup>4</sup>, Mykhailo V. Gonchar <sup>1,4</sup> and Marina Nisnevitch <sup>3,\*</sup>

<sup>1</sup> Institute of Cell Biology, National Academy of Sciences of Ukraine, 79005 Lviv, Ukraine; galina.gayda@nas.gov.ua (G.G.); demkivo@nas.gov.ua (O.D); rserkiz@gmail.com (R.S.); gonchar@cellbiol.ua (M.G.)

<sup>2</sup> Faculty of Veterinary Hygiene, Ecology and Law, Stepan Gzhytskyi National University of Veterinary Medicine and Biotechnologies, 79000 Lviv, Ukraine

<sup>3</sup> Department of Chemical Engineering, Ariel University, Kyriat-ha-Mada, Ariel 4070000, Israel; yannag@ariel.ac.il (Y.G.); marinan@ariel.ac.il (M.N.)

<sup>4</sup> Department of Biology and Chemistry, Drohobych Ivan Franko State Pedagogical University, 82100 Drohobych, Ukraine (H.K.)

\* Correspondence: galina.gayda@gmail.com; galina.gayda@nas.gov.ua; Tel.: +380-226-2144 (G.G.) and marinan@ariel.ac.il; Tel.: +972-3914-3042 (M.N.)

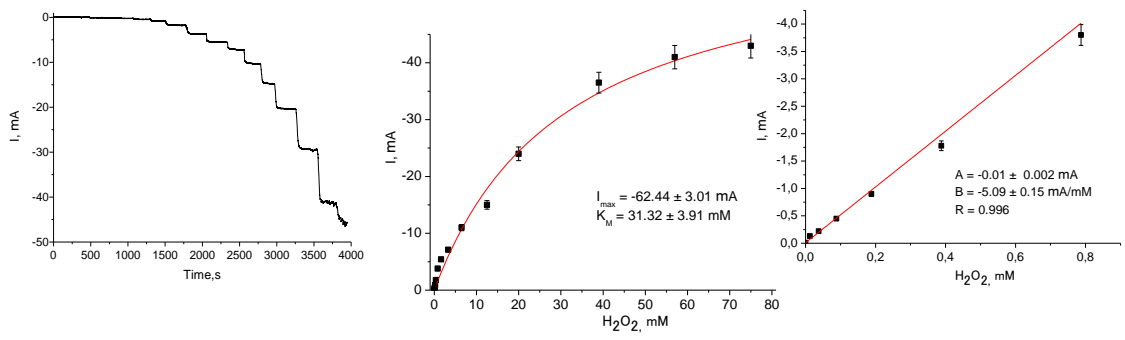

(a)

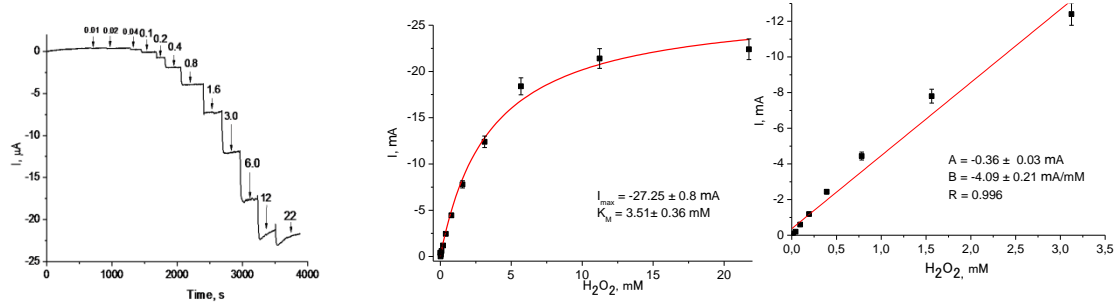

(b)

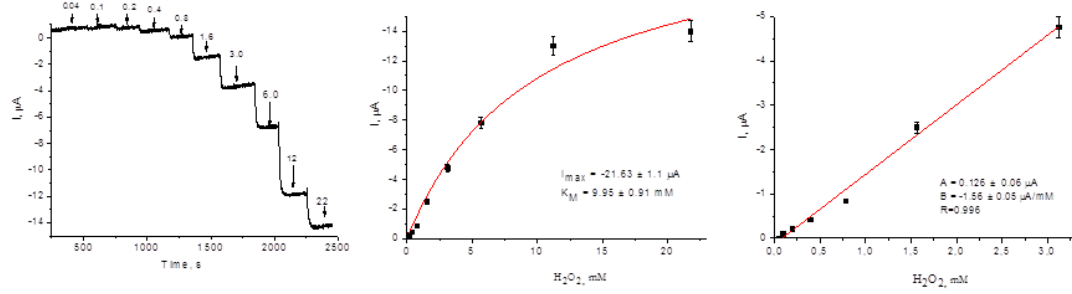

(c)

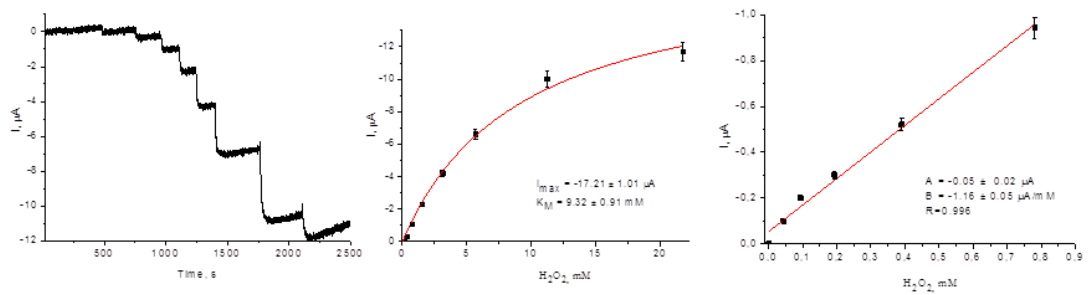

(d)

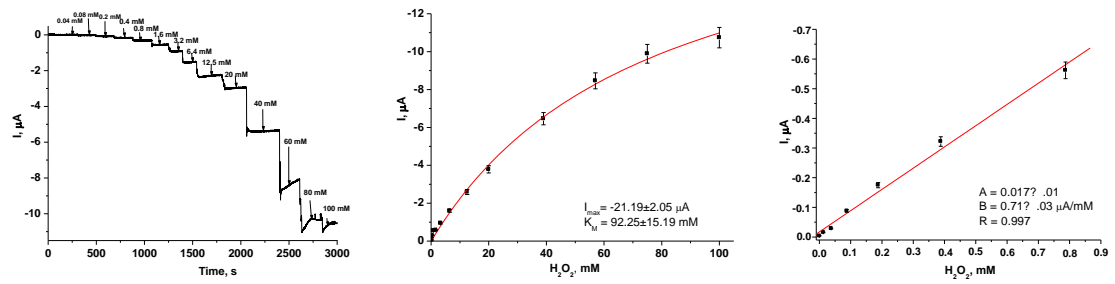

(e)

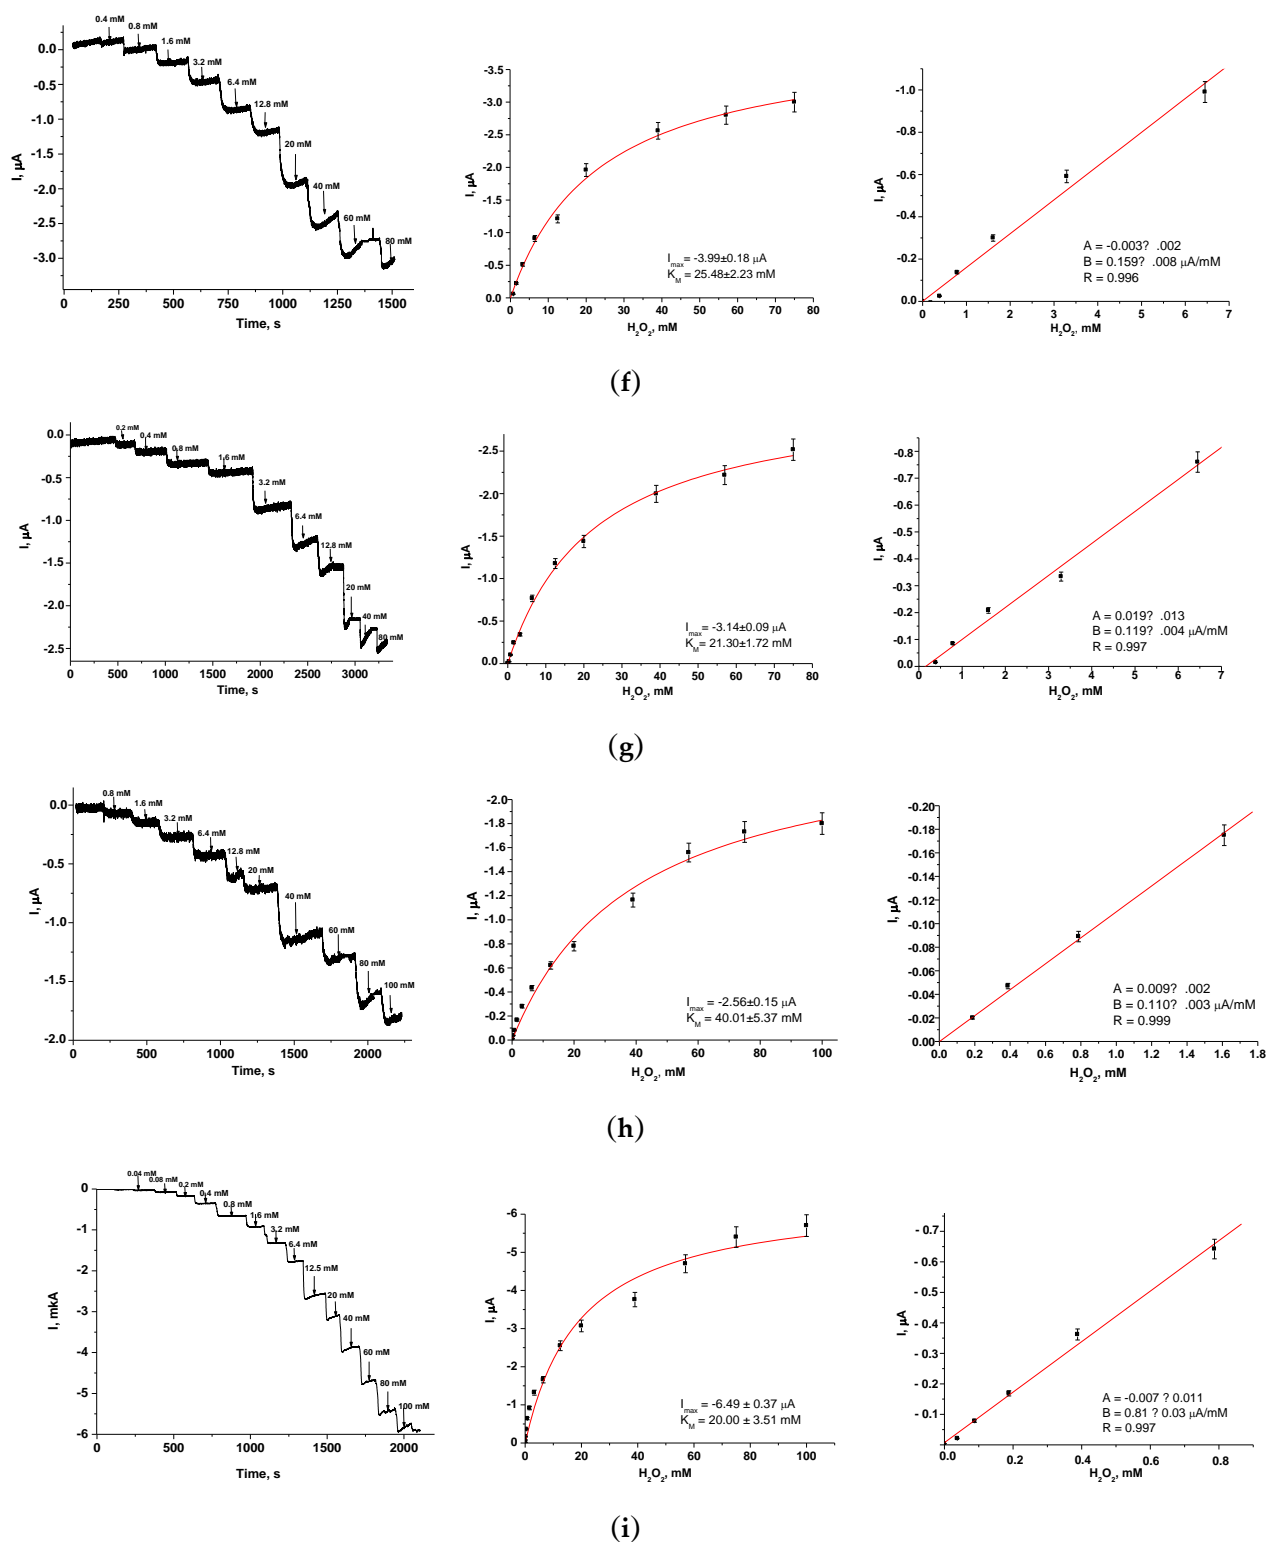

**Figure S1.** Amperometric characteristics of the several modified electrodes: chronoamperograms (left), dependence of the current response on increasing concentrations of  $\text{H}_2\text{O}_2$  (middle) and calibration graphs (right).  $\text{H}_2\text{O}_2$ -sensing films are the following :gPdHCF (a); gCeHCF (b); gYHCF (c); gCoHCF (d); gMnHCF (e); gZnHCF (f); gNdHCF (g); gCdHCF (h) and chCuHCF (i). Conditions: working potential -50 mV vs. Ag/AgCl (reference electrode), 50 mM NaOAc buffer, pH 4.5 at 23°C.

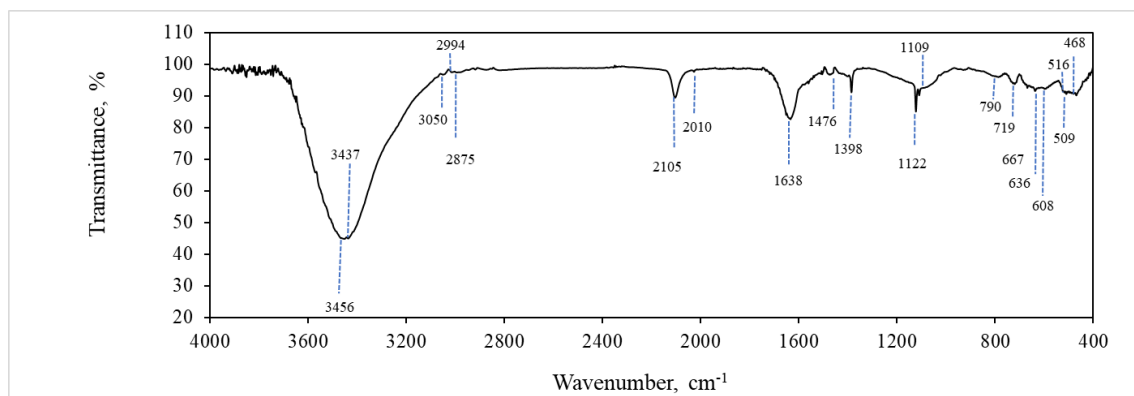

**Figure S2.** FTIR spectrum of the gCuHCF.

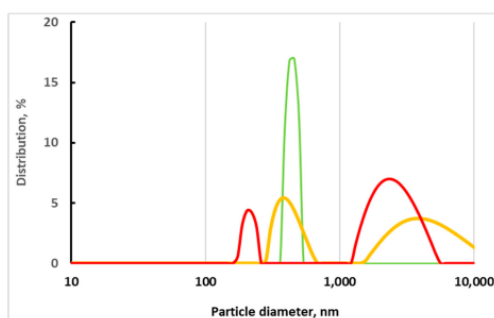

**Figure S3.** DLS plots of particle hydrodynamic diameter of the sample at various concentrations: the green line represents a  $1.3 \times 10^8 \text{ mL}^{-1}$ , the yellow line  $6.6 \times 10^7 \text{ mL}^{-1}$ , and the red line  $3.3 \times 10^7 \text{ mL}^{-1}$  particle concentration.

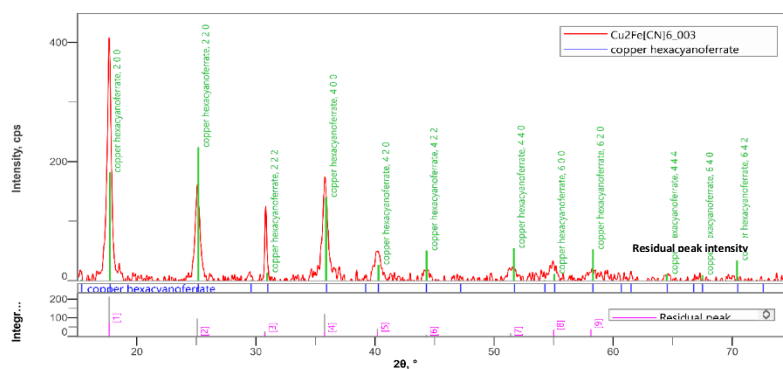

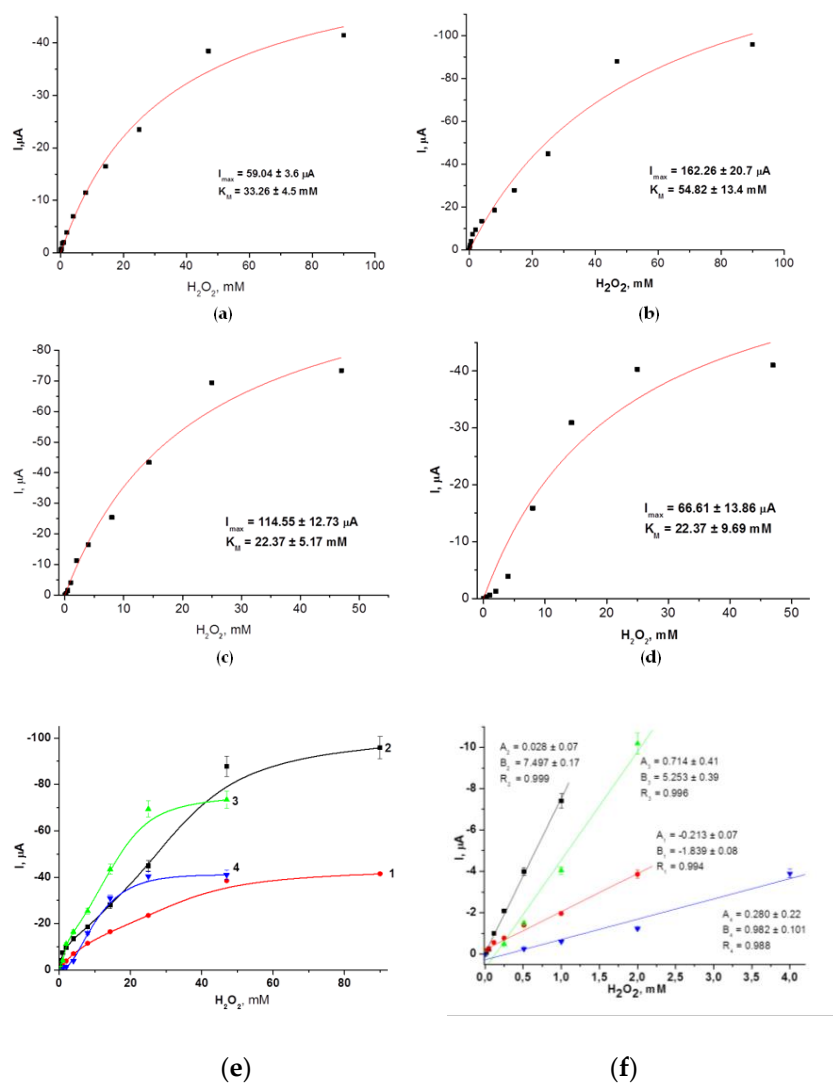

**Figure S5.** Effect of the PO mimetic' activity on the efficiency of  $\text{H}_2\text{O}_2$  sensing. Current response on increasing concentrations of  $\text{H}_2\text{O}_2$  (a-e) and calibration graphs (f) for the GEs modified with different quantities of gCuHCF: (a) 1 mU, (b) 2 mU, (c) 5 mU, (d) 10 mU, (e, f) – combined graphs, lines (1-4) correspond to graphs (a-d), respectively. Conditions: working potential  $-50$  mV, Ag/AgCl (reference electrode) in  $50$  mM NaOAc, pH  $4.5$ .

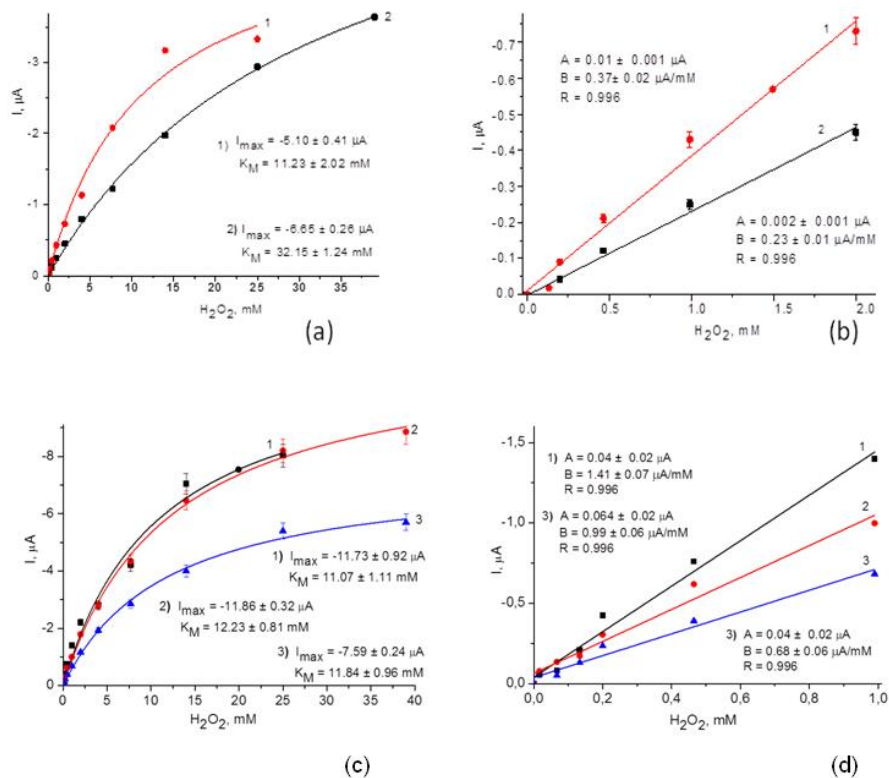

**Figure S6.** Effect of PO mimetic activity and working potential on analytical characteristics of the gCuHCF/GE. Current responses on increasing concentrations of  $\text{H}_2\text{O}_2$  (a, c) and the correspondent calibration graphs (b, d) for GE, modified with different quantities of gCuHCF: (1) 0.07 mU, (2) 0.15 mU, (3) 0.40 mU. Conditions: working potential  $-50$  mV (a, b) and  $-200$  mV (c, d), Ag/AgCl (reference electrode) in 50 mM phosphate buffer, pH 6.0.
